# Supplementary material for: Genotypes Influence Clinical Progression in EYS-Associated Retinitis Pigmentosa
Source: PubMed Central journal article supplement — Transl Vis Sci Technol. 2022 Jul 11;11(7):6. doi: 10.1167/tvst.11.7.6 (PMC9284463; doi:10.1167/tvst.11.7.6), 2022-07-11
Supplement: tvst-11-7-6_s001.pdf [file tvst-11-7-6_s001.pdf]

(A)

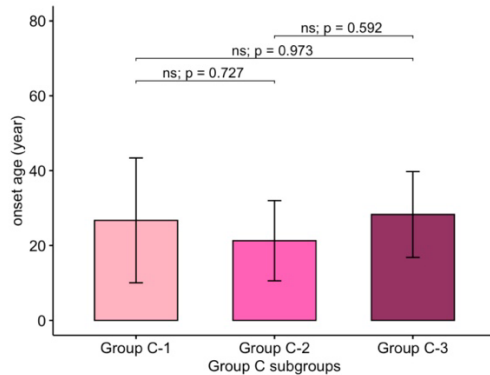

(B)

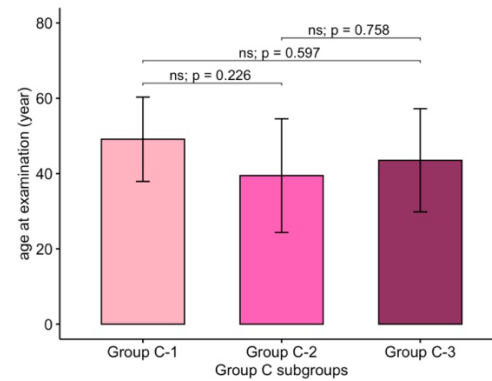

(C)

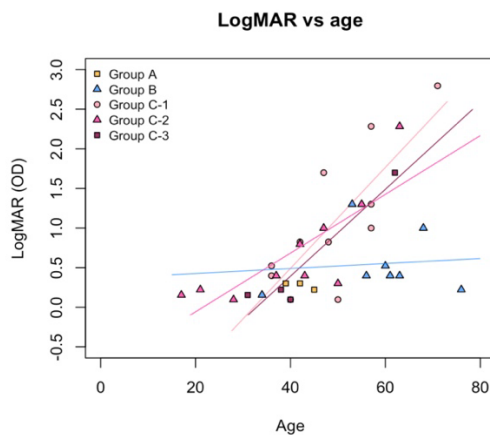

(D)

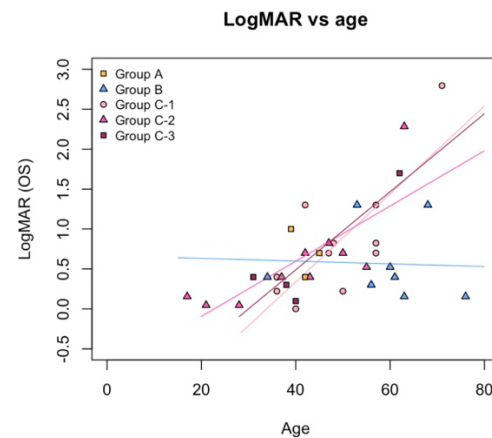

### Supplemental Figure 1

Comparison of onset age, age at examination, and progression of logMAR visual acuity among patients with autosomal recessive retinitis pigmentosa carrying eyes shut homolog (*EYS*) gene variants at different locations. The patients were classified into the following groups: group A had both variants in the N-terminus, group B had one variant in the N-terminus and the other in the C-terminal laminin G containing domain, and group C had both variants in the C-terminus. Group C was further divided into group C-1, group C-2, and group C-3. Group C-1 had two alleles belonging to c.7228+1G>A or c.6416G>A, group C-2 had one allele from c.7228+1G>A or c.6416G>A, and group C-3 had no allele from either c.7228+1G>A or c.6416G>A. The ANOVA analysis with post-hoc Tukey test and linear regression with stepwise selection were performed.

(A) Comparison of onset age among groups C-1, C-2, and C-3. No significant difference was found among these groups. (B) Comparison of age at examination among groups C-1, C-2, and C-3. No significant difference was found among groups. (C, D) Visual acuity of the right (C) and left eyes (D) at the first visit was presented as a function of age. Every point represents an individual patient in our cohort. The blue, light pink, pink, and maroon lines are the linear regression lines for groups B, C-1, C-2, and C-3, respectively. (C) The regression lines of groups B, C-1, C-2, and C-3 were  $y = 0.003 \times \text{age} + 0.36$ ,  $y = 0.064 \times \text{age} - 2.06$ ,  $y = 0.037 \times \text{age} - 0.80$ , and  $y = 0.055 \times \text{age} - 1.80$ , respectively. (D) The regression lines of groups B, C-1, C-2, and C-3 were  $y = -0.001 \times \text{age} + 0.67$ ,  $y = 0.055 \times \text{age} - 1.86$ ,  $y = 0.035 \times \text{age} - 0.79$ , and  $y = 0.049 \times \text{age} - 1.47$ , respectively. The coefficients for age in groups C-1, C-2, C-3 ranged from 0.035 to 0.064, while those of group B were only 0.003 and -0.001. There was no significant difference in the rate of visual acuity decline among groups C-1, C-2, and C-3, while they all showed a more severe disease progression than group B patients. OD, right eye; OS, left eye.
